# Supplementary material
Source: Springer Nature journal article supplement (https://www.springermedizin.de/resource/supplementary/12889_2008_1506_MOESM3_ESM.pdf/9503302)

ARV Treatment Duration

Physical  
QoL

Adverse effects

Emotional  
QoL

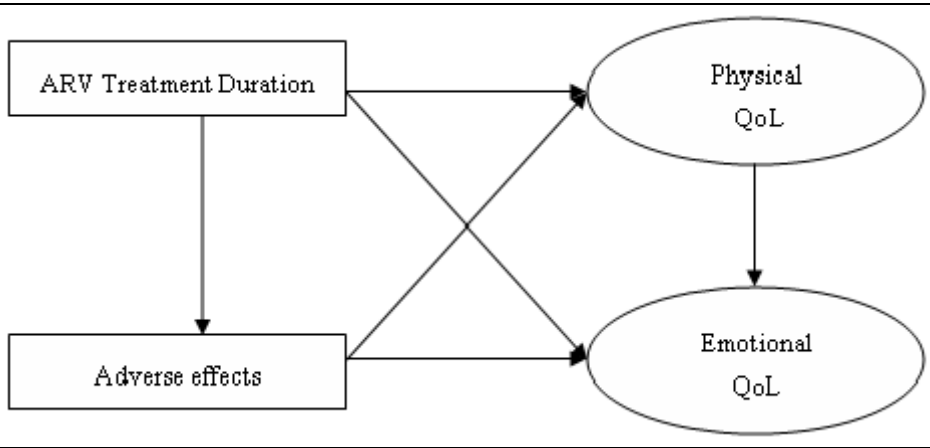

Supplement: MOESM3 [file 9503302]
